# Supplementary material for: Impaired APP activity and altered tau splicing in embryonic stem cell-derived astrocytes derived from the APPsw transgenic minipig
Source: Oxford University Press journal article supplement (doi:10.1242/dmm.019489), 2015-01-01
Supplement: dmm019489supp.pdf [file dmm019489supp.pdf]

**Supplementary Table S1. Primer list**

| Name                          | Primers 5'-3'                                                 | Temperature (°C) | Size (bp) | NCBI ref. #    |
|-------------------------------|---------------------------------------------------------------|------------------|-----------|----------------|
| <i>CCND1</i>                  | 5'-GACCGCTTCCTGTCCCTG-3'<br>3'-GTGGCACAGAGGGCGACGA-3'         | 66+72            | 316       | NW_003609508.1 |
| <i>CCND3</i>                  | 5'-CAGCCAGACCAGCACTCCCA-3'<br>5'-CTCGGGCTTCGGCTGTGG-3'        | 71+72            | 153       | NW_003610640.1 |
| <i>CEND1</i>                  | 5'-CGACAACCACAGCAACCTG-3'<br>5'-CCACACCGAGAATCAGG-3'          | 65+59            | 211       | NM_213866      |
| <i>GAPDH</i>                  | 5'-TCGGAGTGAACGGATTTG-3'<br>5'-AGGTGGCGATCTCGATGTCC-3'        | 54+53            | 219       | AF017079       |
| <i>GFAP</i>                   | 5'-TTGACCTGCGACGGGAGTC-3'<br>5'-AGGTGGCGATCTCGATGTCC-3'       | 61+62            | 225       | NC_010454.3    |
| <i>GLI1</i>                   | 5'-GACACACCTGCGGTCACACA-3'<br>5'-CACATACGGCTTCTCATT-3'        | 69+56            | 132       | NM_001256593.1 |
| <i>GLIS3</i>                  | 5'-GTTTGCACCTTCTGCTCCAT-3'<br>5'-GAAAAGAAGAGCTTGTGTCTGG-3'    | 57+58            | 152       | NC_010443.4    |
| <i>HES1</i>                   | 5'-GACGAAGAGCAAGAATA-3'<br>5'-GCTCCACTGTCATTTCCA-3'           | 51+60            | 125       | HM235721.1     |
| <i>hAPP</i>                   | 5'-GCAGCAGAATAGGCGAGA-3'<br>5'-CAGCAGGAGCAGTGCCAAA-3'         | 42+60            | 168       | NM_000484.3    |
| <i>hAPP<sup>sw</sup> set1</i> | 5'-CTGTCCAAGATGCAGCAGAA-3'<br>5'-GGGAGGTGTGGGAGGTTTT-3'       | 57+59            | 150       | NC_018932.2    |
| <i>hAPP<sup>sw</sup> set2</i> | 5'-AGCGCCACCTGTCCAAGAT-3'<br>5'-TCAGGTTTCAGGGGGAGGT-3'        | 59+58            | 169       | NC_018932.2    |
| <i>MAP2a</i>                  | 5'-GCACCTATTCAGATACCAA-3'<br>5'-GTGACTACTTGAACATCCT-3'        | 55+49            | 102       | NW_003536476.1 |
| <i>MBP</i>                    | 5'-GAGGCAGAGCTCCTGACTACAAA-3'<br>5'-GTCCCGTCTCCAGCTT-3'       | 61+59            | 101       | NC_010458.3    |
| <i>MUSASHI</i>                | 5'-GGAGTGTCTGGTGATGCGGGA-3'<br>5'-CTGTGGTGTTTACTGTTA-3'       | 65+40            | 206       | FP690339.1     |
| <i>NEO</i>                    | 5'-TGCTCC TGCCGAGAAAAGTAT-3'<br>5'-GCTCTTCGTCCAGATCATCC-3'    | 57+59            | 164       |                |
| <i>NOTCH1</i>                 | 5'-CTGCAGCCCTCGCCCTGC-3'<br>5'-TCGTCAATGTTCTCGCT-3'           | 77+58            | 358       | XM_003472989.2 |
| <i>OLIG2</i>                  | 5'-CAAGTCATCTTCGTCCAGCA-3'<br>5'-AGTCGCTTCATCTCCTCCAG-3'      | 64+64            | 291       | NC_010455.4    |
| <i>pAPP</i>                   | 5'-CAGCGGTAGGAGAGAGCA-3'<br>5'-CAGCAGGACCAGTGCCAAA-3'         | 54+60            | 163       | NW_003536127.1 |
| <i>PTCH1</i>                  | 5'-CTGTGGCTGAGAGCGAAGT-3'<br>5'-CTCGTCCACCAACTTCCA-3'         | 64+63            | 177       | XM_005668022.1 |
| <i>PAX6</i>                   | 5'-GCGACTCCAGAAGTTGTA-3'<br>5'-CCATTCAACATCCTTAGT-3'          | 48+44            | 215       | NC_010444.3    |
| <i>PDGFb</i>                  | 5'-GTCTCTCTGCTGCTACCT-3'<br>5'-GGAAGTTGGCGTTGGTGCGGT-3'       | 46+69            | 143       | NC-010447.4    |
| <i>SOX2</i>                   | 5'-CCAGAAGAACAGCCCGAGA-3'<br>5'-GCAGCGTTCGCAGCCG-3'           | 56+65            | 203       | TC269881       |
| <i>TBP</i>                    | 5'-AACAGTTCAGTAGTTATGAGCCAGA-3'<br>5'-AGATGTTCTCAAACGCTTCG-3' | 60+55            | 153       | NC_010449.4    |
| <i>Vimentin</i>               | 5'-GGAATCCGTAACATCAGT-3'<br>5'-CCAGACCAAGGACACCATCA-3'        | 46+58            | 201       | CU570641.2     |
| <i>5.8S</i>                   | 5'-GACTCTTAGCGGTGGAT-3'<br>5'-GCGACGCTCAGACAGGC-3'            | 55+67            | 154       | NR_046250.1    |
| <i>18S</i>                    | 5'-CAGTTATGGTTCCTTTGGT-3'<br>5'-CGAAAGTTGATAGGGCA-3'          | 56+57            | 365       | NR_046261.1    |
| <i>28S</i>                    | 5'-GCAGCAGGTCTCCAAGGTGAA-3'<br>5'-CCTTAGAGCCAATCCTTA-3'       | 62+47            | 136       | NW_003610361.1 |

Abbreviations: Temp, temperature; bp, base pair; ref., reference.

**Supplementary Table S2. List of antibodies and dilutions used**

| Name (anti-)                               | Catalogue Number | Company           | Dilution |
|--------------------------------------------|------------------|-------------------|----------|
| ADAM10                                     | sc-28358         | Santa Cruz        | 1:1000   |
| APP (Y757)                                 | ab19850          | Abcam             | 1:100    |
| APP (A4)                                   | MAB348           | Millipore         | 1:1000   |
| AT8                                        | MN1020           | Thermo Scientific | 1:500    |
| (pSer <sup>202</sup> /Thr <sup>205</sup> ) |                  |                   |          |
| AT100                                      | MN1060           | Thermo Scientific | 1:1000   |
| (pThr <sup>212</sup> /Ser <sup>214</sup> ) |                  |                   |          |
| AT180 (pThr <sup>231</sup> )               | MN1040           | Thermo Scientific | 1:1000   |
| AT270 (pThr <sup>181</sup> )               | MN1050           | Thermo Scientific | 1:1000   |
| BACE1                                      | sc-10748         | Santa Cruz        | 1:1000   |
| BLBP/FABP                                  | sc-374-588       | Santa Cruz        | 1:100    |
| CENP-A                                     | 2048             | Cell Signaling    | 1:800    |
| DLX2                                       | sc-292374        | Santa Cruz        | 1:100    |
| EF-1-alpha1                                | sc-28578         | Santa Cruz        | 1:1000   |
| GFAP                                       | Z0334            | Dako              | 1:1000   |
| KI-67                                      | M7240            | Dako              | 1:100    |
| MAP2ab                                     | M1406            | Sigma             | 1:500    |
| Nestin                                     | ab5922           | Millipore         | 1:4000   |
| PEN2                                       | sc-32946         | Santa Cruz        | 1:1000   |
| PHF-6 (pThr <sup>231</sup> )               | ab24594          | Abcam             | 1:1000   |
| SATB2                                      | ab34735          | Abcam             | 1:800    |
| SEPTIN7                                    | HPA02309         | Atlas             | 1:1000   |
| SOX2                                       | MAB2018          | R&DSystems        | 1:100    |
| Tau (total)                                | A0024            | DAKO              | 1:1000   |
| Tau (pSer <sup>199</sup> )                 | 44-734G          | Invitrogen        | 1:1000   |
| Tau (pSer <sup>199/202</sup> )             | 44-768G          | Invitrogen        | 1:1000   |
| Tau (pSer <sup>262</sup> )                 | 44-750G          | Invitrogen        | 1:1000   |
| Tau (pSer <sup>356</sup> )                 | 44-751G          | Invitrogen        | 1:1000   |
| Tau (pSer <sup>396</sup> )                 | 44-752G          | Invitrogen        | 1:1000   |
| Tau (pSer <sup>404</sup> )                 | 44-758G          | Invitrogen        | 1:1000   |
| Tau (pSer <sup>422</sup> )                 | 44-764G          | Invitrogen        | 1:1000   |
| Tau5 (total tau)                           | AHB0042          | Invitrogen        | 1:500    |
| Tau46 (total tau)                          | ab22261          | Abcam             | 1:1000   |
| TBR1                                       | ab31940          | Abcam             | 1:800    |
| TUJ1                                       | T8660            | Sigma             | 1:4000   |
| Vimentin                                   | 18-0052          | Zymed             | 1:500    |
